# Supplementary material
Source: PubMed Central journal article supplement (PMC4004338)
Supplement: NIHMS573840-supplement-supplement_1.pdf [file NIHMS573840-supplement-supplement_1.pdf]

## Supplemental Materials

**Methods***Data Collection*

Quantitative measures of emphysema and airway wall thickness were generated with SLICER (<http://www.slicer.org>) and VIDA software (VIDA Diagnostics, Iowa City, IA; <http://www.vidadiagnostics.com>), respectively.(1) Dyspnea and lung disease-specific quality of life measures were obtained through the use of previously validated questionnaire items.(2;3)

*Cross-Validation Estimates of Cluster Stability*

To assess the stability of various cluster solutions, we used five-fold cross validation to derive estimates of cluster stability as quantified by the average normalized mutual information (NMI). Normalized mutual information quantifies the dependency between variables, and it ranges from 0 (no dependency) to 1 (high dependency). Unlike Pearson correlation, NMI captures nonlinear in addition to linear dependency between variables. This procedure was carried out entirely in the training portion of the data. Four-fifths of the training sample served as the cross-validation training set (CV Train) and the remaining one-fifth of the data served as cross-validation test set (CV Test). Using the learned centroids from the CV Train set, clusters were predicted in the CV Test set and then compared to the cluster results for that fold obtained by running k-means on the entire (original) training sample. NMI quantified the degree of agreement, and the average NMI results obtained from each of the five rounds of cross-validation were used to prioritize cluster solutions by stability.

### *Genetic Association Testing*

Genetic associations were performed in non-Hispanic white (NHW) subjects only using additive genetic coding and adjusted for principal components of genetic ancestry. A Bonferonni-adjusted statistical significance of  $p=0.0007$  for genetic associations in the training set was defined based on 70 genetic association tests performed. The threshold for validation in the independent sample was  $p=0.05$ .

### *Missing Data*

We employed a complete cases approach and excluded individuals from analysis who were missing data in any of the variables used for clustering, cluster association testing or interpretation. There was no difference in age of pack-years between included and excluded subjects (Supplemental Table 8). There was statistically significant but relatively minor differences in FEV<sub>1</sub> and FEV<sub>1</sub>/FVC, and there were significant differences in gender and racial composition. Subjects with missing data were more likely to be female and African-American. Of the 10,300 individuals enrolled in COPDGene, 108 non-smokers were excluded from analysis, as well as 63 individuals with inadequate spirometry data. Of the remaining 10,129 individuals, 511 did not receive an inspiratory or expiratory scan. An additional 953 subjects failed quality control for either the inspiratory or expiratory scan, and 64 subjects were excluded for an FRC/TLC ratio >1. Of the remaining 8,601 subjects, 143 had incomplete data for emphysema distribution. An additional 170 individuals were excluded due to missing data for the following variables: airway wall thickness (n=4), gas

1  
2  
3  
4  
5  
6  
7  
8  
9  
10  
11  
12  
13  
14  
15  
16  
17  
18  
19  
20  
21  
22  
23  
24  
25  
26  
27  
28  
29  
30  
31  
32  
33  
34  
35  
36  
37  
38  
39  
40  
41  
42  
43  
44  
45  
46  
47  
48  
49  
50  
51  
52  
53  
54  
55  
56  
57  
58  
59  
60

trapping (n=44), resting oxygen saturation (n=2), MMRC dyspnea score (n=11), and BODE (n=109).

Confidential: For Review Only

Supplemental Table 1. Feature Descriptions for Comprehensive Feature Set

|                              | Variables                                           | Descriptions                                                                                                                                                                 |
|------------------------------|-----------------------------------------------------|------------------------------------------------------------------------------------------------------------------------------------------------------------------------------|
| Spirometry-Defined Variables | Post-bronchodilator FEV <sub>1</sub> % of predicted | observed FEV <sub>1</sub> (liters)/predicted FEV <sub>1</sub> (liters) from Hankinson equations                                                                              |
|                              | FVC                                                 | observed forced vital capacity (liters)                                                                                                                                      |
|                              | FEV <sub>1</sub> /FVC                               | observed FEV <sub>1</sub> (liters)/observed FVC (liters)                                                                                                                     |
|                              | BDR as % of FEV <sub>1</sub>                        | % Change in FEV <sub>1</sub> volume: (post-bronchodilation FEV <sub>1</sub> - pre-bronchodilation FEV <sub>1</sub> , liters) /post-bronchodilation FEV <sub>1</sub> (liters) |
|                              | BDR as % of FVC                                     | % Change in FVC volume: (post-bronchodilation FVC - pre-bronchodilation FVC, liters) /post-bronchodilation FVC (liters)                                                      |
| CT-Defined Variables         | log-transformed emphysema (%LAA -950HU*)            | log(%LAA -950HU + 1)                                                                                                                                                         |
|                              | Log ratio of Upper Third to Lower Third Emphysema   | log(%LAA -950 in upper third of lung/%LAA -950 in lower third of lung)                                                                                                       |
|                              | Segmental Wall Area %                               | Area of airway wall/area of entire airway for 6 selected segmental level airways (RB1, RB4, RB10, LB1, LB4, LB10)                                                            |
|                              | TLC % of Predicted                                  | TLC measured from inspiratory CT (liters)/predicted TLC (liters)                                                                                                             |
|                              | FRC % of Predicted                                  | FRC measured from expiratory CT (liters)/predicted FRC (liters)                                                                                                              |
|                              | Gas Trapping                                        | %LAA -856HU on expiratory scan                                                                                                                                               |
| Other Physiologic Measures   | BMI                                                 | weight (kg)/height (m <sup>2</sup> )                                                                                                                                         |
|                              | Oxygen Saturation                                   | peripheral oxygen saturation, %                                                                                                                                              |
| * HU = Hounsfield units      |                                                     |                                                                                                                                                                              |

Supplemental Table 2. Cluster Associations in Training Sample for CF4 Solution Adjusting for GOLD 2007 Stage

|                             | Training |          |       |         |       |         |
|-----------------------------|----------|----------|-------|---------|-------|---------|
|                             | C2:OR    | C2:pval  | C3:OR | C3:pval | C4:OR | C4:pval |
| Exacerbations               | 1.62     | <0.001   | 2.03  | <0.001  | 2.98  | <0.001  |
| MMRC                        | 2.24     | <0.001   | 2.27  | <0.001  | 2.46  | <0.001  |
| BODE                        | 2.45     | <0.001   | 2.54  | <0.001  | 4.27  | <0.001  |
| Hospitalizations/ER Visits  | 3.15     | <0.001   | 3.45  | <0.001  | 3.44  | <0.001  |
| rs7671167 ( <i>FAM13A</i> ) | 0.98     | 0.81     | 0.96  | 0.59    | 0.89  | 0.53    |
| rs1980057 ( <i>HHIP</i> )   | 0.66     | 7.81E-05 | 0.92  | 0.35    | 0.78  | 0.16    |
| rs13180 (Chr15q)            | 0.89     | 0.26     | 1.16  | 0.08    | 1.06  | 0.75    |
| rs8034191 (Chr15q)          | 1.19     | 0.09     | 0.90  | 0.22    | 1.13  | 0.49    |
| rs7937 (Chr 19q)            | 1.31     | 0.01     | 1.11  | 0.21    | 1.21  | 0.31    |

OR = odds ratio. Effect sizes represent odds ratio from logistic regression or proportional odds logistic regression in the case of Exacerbations, MMRC Score, and BODE index.

Supplemental Table 3. Cluster Associations in Training Sample for CF4 Solution Adjusting for GOLD 2011 A-D Classes

|                             | Training |          |       |         |       |         |
|-----------------------------|----------|----------|-------|---------|-------|---------|
|                             | C2:OR    | C2:pval  | C3:OR | C3:pval | C4:OR | C4:pval |
| Exacerbations               | 1.75     | <0.001   | 1.96  | <0.001  | 2.11  | <0.001  |
| MMRC                        | 2.19     | <0.001   | 2.30  | <0.001  | 4.15  | <0.001  |
| BODE                        | 2.55     | <0.001   | 2.93  | <0.001  | 22.87 | <0.001  |
| Hospitalizations/ER Visits  | 3.28     | <0.001   | 3.42  | <0.001  | 4.54  | <0.001  |
| rs7671167 ( <i>FAM13A</i> ) | 0.96     | 0.64     | 0.93  | 0.35    | 0.87  | 0.24    |
| rs1980057 ( <i>HHIP</i> )   | 0.64     | 1.36E-05 | 0.91  | 0.24    | 0.83  | 0.11    |
| rs13180 (Chr15q)            | 0.89     | 0.24     | 1.11  | 0.19    | 0.95  | 0.67    |
| rs8034191 (Chr15q)          | 1.21     | 0.06     | 0.92  | 0.31    | 1.28  | 0.04    |
| rs7937 (Chr 19q)            | 1.33     | 0.004    | 1.13  | 0.11    | 1.29  | 0.03    |

OR = odds ratio. Effect sizes represent odds ratio from logistic regression or proportional odds logistic regression in the case of Exacerbations, MMRC Score, and BODE index.

Supplemental Table 4. Cluster Associations in Training Sample Using Cluster 2 (ULP) as Reference

| Response                                         | Group | OR (CI)             | P      |
|--------------------------------------------------|-------|---------------------|--------|
| Exacerbations                                    | C1    | 0.44 (0.38-0.51)    | <0.001 |
|                                                  | C3    | 1.39 (1.22-1.58)    | 0.01   |
|                                                  | C4    | 3.93 (3.47-4.46)    | <0.001 |
| BODE                                             | C1    | 0.3 (0.27-0.33)     | <0.001 |
|                                                  | C3    | 1.37 (1.25-1.51)    | <0.001 |
|                                                  | C4    | 19.75 (17.72-22.03) | <0.001 |
| MMRC                                             | C1    | 0.36 (0.33-0.39)    | <0.001 |
|                                                  | C3    | 1.21 (1.1-1.32)     | 0.04   |
|                                                  | C4    | 3.87 (3.52-4.26)    | <0.001 |
| Hospitalizations/<br>ER Visits                   | C1    | 0.25 (0.2-0.3)      | <0.001 |
|                                                  | C3    | 1.24 (1.06-1.45)    | 0.17   |
|                                                  | C4    | 2.91 (2.5-3.38)     | <0.001 |
| rs7671167                                        | C1    | 0.95 (0.87-1.04)    | 0.59   |
|                                                  | C3    | 0.91 (0.83-1)       | 0.33   |
|                                                  | C4    | 0.9 (0.82-0.99)     | 0.29   |
| rs1980057                                        | C1    | 0.64 (0.58-0.7)     | <0.001 |
|                                                  | C3    | 1.42 (1.28-1.56)    | <0.001 |
|                                                  | C4    | 1.21 (1.1-1.34)     | 0.05   |
| rs13180                                          | C1    | 0.82 (0.75-0.9)     | 0.03   |
|                                                  | C3    | 1.29 (1.17-1.42)    | 0.01   |
|                                                  | C4    | 1.01 (0.91-1.11)    | 0.93   |
| rs8034191                                        | C1    | 1.33 (1.21-1.46)    | 0.002  |
|                                                  | C3    | 0.76 (0.69-0.84)    | 0.01   |
|                                                  | C4    | 1.1 (1-1.22)        | 0.31   |
| rs7937                                           | C1    | 1.3 (1.18-1.42)     | 0.004  |
|                                                  | C3    | 0.9 (0.81-0.99)     | 0.26   |
|                                                  | C4    | 0.92 (0.83-1.02)    | 0.41   |
| Reference cluster -- C2 (Upper Lobe Predominant) |       |                     |        |

Supplemental Table 5. Cluster Associations in Training Sample Using Cluster 3 (AP) as Reference

| Response                                     | Group | OR (CI)             | P      |
|----------------------------------------------|-------|---------------------|--------|
| Exacerbations                                | C1    | 0.32 (0.28-0.36)    | <0.001 |
|                                              | C2    | 0.72 (0.63-0.82)    | 0.01   |
|                                              | C4    | 2.82 (2.56-3.12)    | <0.001 |
| BODE                                         | C1    | 0.22 (0.2-0.23)     | <0.001 |
|                                              | C2    | 0.73 (0.66-0.8)     | <0.001 |
|                                              | C4    | 14.37 (13.06-15.81) | <0.001 |
| MMRC                                         | C1    | 0.29 (0.27-0.32)    | <0.001 |
|                                              | C2    | 0.83 (0.76-0.91)    | <0.001 |
|                                              | C4    | 3.21 (2.95-3.48)    | <0.001 |
| Hospitalizations/<br>ER Visits               | C1    | 0.2 (0.17-0.24)     | <0.001 |
|                                              | C2    | 0.81 (0.69-0.94)    | <0.001 |
|                                              | C4    | 2.34 (2.08-2.64)    | <0.001 |
| rs7671167                                    | C1    | 0.32 (0.28-0.36)    | 0.05   |
|                                              | C2    | 0.72 (0.63-0.82)    | 0.33   |
|                                              | C4    | 2.82 (2.56-3.12)    | 0.86   |
| rs1980057                                    | C1    | 0.22 (0.2-0.23)     | 0.22   |
|                                              | C2    | 0.73 (0.66-0.8)     | <0.001 |
|                                              | C4    | 14.37 (13.06-15.81) | 0.05   |
| rs13180                                      | C1    | 0.29 (0.27-0.32)    | 0.62   |
|                                              | C2    | 0.83 (0.76-0.91)    | 0.01   |
|                                              | C4    | 3.21 (2.95-3.48)    | 0.004  |
| rs8034191                                    | C1    | 0.2 (0.17-0.24)     | 0.66   |
|                                              | C2    | 0.81 (0.69-0.94)    | 0.01   |
|                                              | C4    | 2.34 (2.08-2.64)    | <0.001 |
| rs7937                                       | C1    | 0.32 (0.28-0.36)    | 0.03   |
|                                              | C2    | 0.72 (0.63-0.82)    | 0.26   |
|                                              | C4    | 2.82 (2.56-3.12)    | 0.75   |
| Reference cluster -- C3 (Airway Predominant) |       |                     |        |

Supplemental Table 6. Cluster Associations in Training Sample Using Cluster 4 (SE) as Reference

| Response                                     | Group | OR (CI)          | P      |
|----------------------------------------------|-------|------------------|--------|
| Exacerbations                                | C1    | 0.11 (0.1-0.13)  | <0.001 |
|                                              | C2    | 0.25 (0.22-0.29) | <0.001 |
|                                              | C3    | 0.35 (0.32-0.39) | <0.001 |
| BODE                                         | C1    | 0.02 (0.01-0.02) | <0.001 |
|                                              | C2    | 0.05 (0.05-0.06) | <0.001 |
|                                              | C3    | 0.07 (0.06-0.08) | <0.001 |
| MMRC                                         | C1    | 0.09 (0.08-0.1)  | <0.001 |
|                                              | C2    | 0.26 (0.23-0.28) | <0.001 |
|                                              | C3    | 0.31 (0.29-0.34) | <0.001 |
| Hospitalizations/<br>ER Visits               | C1    | 0.08 (0.07-0.1)  | <0.001 |
|                                              | C2    | 0.34 (0.3-0.4)   | <0.001 |
|                                              | C3    | 0.43 (0.38-0.48) | <0.001 |
| rs7671167                                    | C1    | 0.84 (0.78-0.91) | 0.95   |
|                                              | C2    | 0.9 (0.82-0.99)  | 0.10   |
|                                              | C3    | 0.99 (0.91-1.07) | 0.19   |
| rs1980057                                    | C1    | 0.79 (0.73-0.85) | 0.01   |
|                                              | C2    | 1.21 (1.1-1.34)  | 0.24   |
|                                              | C3    | 0.86 (0.8-0.93)  | <0.001 |
| rs13180                                      | C1    | 0.82 (0.76-0.88) | <0.001 |
|                                              | C2    | 1.01 (0.91-1.11) | 0.90   |
|                                              | C3    | 0.79 (0.73-0.86) | 0.01   |
| rs8034191                                    | C1    | 1.5 (1.39-1.61)  | 0.004  |
|                                              | C2    | 1.1 (1-1.22)     | 0.13   |
|                                              | C3    | 1.42 (1.31-1.54) | 0.03   |
| rs7937                                       | C1    | 1.2 (1.12-1.29)  | 0.38   |
|                                              | C2    | 0.92 (0.83-1.02) | 0.38   |
|                                              | C3    | 1.03 (0.95-1.11) | <0.001 |
| Reference cluster == C3 (Airway Predominant) |       |                  |        |



Supplemental Table 7. Comparison of Clustering Assignment in GOLD 2-4 Subjects from Clustering Performed in All Subjects and Clustering Performed in GOLD 2-4 Only

|                                                             |    | Classification of GOLD 2-4 Subjects in All Subjects Analysis |     |     |     |
|-------------------------------------------------------------|----|--------------------------------------------------------------|-----|-----|-----|
| Classification of GOLD 2-4 Subjects in Case Only Clustering |    | C1                                                           | C2  | C3  | C4  |
|                                                             | C1 | 107                                                          | 179 | 0   | 0   |
|                                                             | C2 | 0                                                            | 0   | 379 | 1   |
|                                                             | C3 | 0                                                            | 7   | 8   | 827 |

Supplemental Table 8. Characteristics of Subjects Excluded for Missing Data Compared to Analyzed Subjects

| Characteristic                                                                         | Subjects with Complete Data | Subjects Excluded for Missing Data | P-value |
|----------------------------------------------------------------------------------------|-----------------------------|------------------------------------|---------|
| N                                                                                      | 8288                        | 1904                               | ---     |
| Gender, % Female                                                                       | 0.46                        | 0.50                               | 0.01    |
| Race, % African-American                                                               | 0.32                        | 0.42                               | <0.001  |
| Age                                                                                    | 58.9 (14.4)                 | 58.4 (14.8)                        | 0.15    |
| Pack Years                                                                             | 39.5 (27.8)                 | 38.3 (26.9)                        | 0.15    |
| FEV <sub>1</sub> , % of predicted                                                      | 81.0 (34.3)                 | 78.8 (39.6)                        | <0.001  |
| FEV <sub>1</sub> /FVC                                                                  | 0.72 (0.20)                 | 0.71 (0.23)                        | 0.006   |
| 63 excluded subjects were missing data for the analyzed characteristics above.         |                             |                                    |         |
| P-value obtained by Pearson's chi-square test (proportions) or Wilcoxon rank sum test. |                             |                                    |         |

Supplemental Table 9. Detailed Smoking Information for Training and Validation Data

| Characteristic                  | Training    | Validation  |
|---------------------------------|-------------|-------------|
| N                               | 4187        | 4101        |
| Pack-Years, median (IQR)        | 39.3 (28.0) | 39.7 (27.0) |
| Smoking Intensity, median (IQR) | 20 (10)     | 20 (10)     |
| Smoking Duration in years       | 36.4 (10.1) | 36.4 (10.2) |
| Age Started Smoking             | 16.9 (4.5)  | 16.8 (4.7)  |

Supplemental Figure 1. Average Number of Exacerbations of Past Year, MMRC Score, BODE Index, and Number of ER Visits and Hospitalizations by Cluster

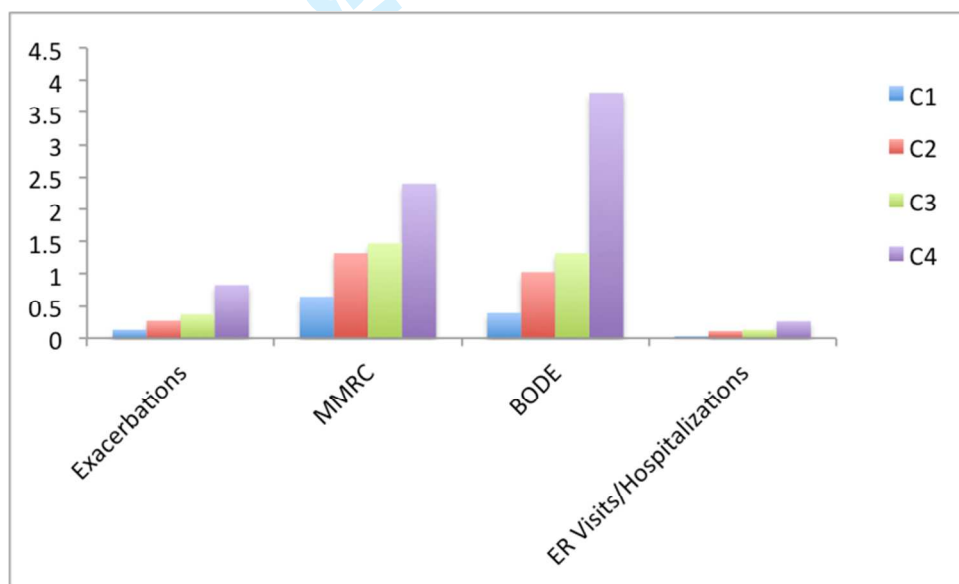

Reference List

- 1
- 2
- 3
- 4 (1) Hu S, Hoffman EA, Reinhardt JM. Automatic lung segmentation for accurate quantitation of
- 5 volumetric X-ray CT images. IEEE Trans Med Imaging 2001 June;20(6):490-8.
- 6
- 7 (2) Jones PW, Quirk FH, Baveystock CM, Littlejohns P. A self-complete measure of health status for
- 8 chronic airflow limitation. The St. George's Respiratory Questionnaire. Am Rev Respir Dis 1992
- 9 June;145(6):1321-7.
- 10
- 11 (3) Bestall JC, Paul EA, Garrod R, Garnham R, Jones PW, Wedzicha JA. Usefulness of the Medical
- 12 Research Council (MRC) dyspnoea scale as a measure of disability in patients with chronic
- 13 obstructive pulmonary disease. Thorax 1999 July;54(7):581-6.
- 14
- 15
- 16
- 17
- 18
- 19
- 20
- 21
- 22
- 23
- 24
- 25
- 26
- 27
- 28
- 29
- 30
- 31
- 32
- 33
- 34
- 35
- 36
- 37
- 38
- 39
- 40
- 41
- 42
- 43
- 44
- 45
- 46
- 47
- 48
- 49
- 50
- 51
- 52
- 53
- 54
- 55
- 56
- 57
- 58
- 59
- 60
